# Supplementary material for: Dissemination of transposon Tn6001 in carbapenem-non-susceptible and extensively drug-resistant Pseudomonas aeruginosa in Taiwan
Source: PubMed Central journal article supplement — J Antimicrob Chemother. 2009 Sep 22;64(6):1170–4. doi: 10.1093/jac/dkp341 (PMC2775663; doi:10.1093/jac/dkp341), 2009-09-22

## Supplementary data

**Table S1.** Primers

| Primer                          | Sequence (5' to 3')                    | Target                        | Accession no.                | Position    | Reference  |
|---------------------------------|----------------------------------------|-------------------------------|------------------------------|-------------|------------|
| Tn-IR                           | ggggCgAATAgAgAAAACggAAAAAATCgTACgCTAAg | Tn6001 inverted repeat        | EF138817                     | 1-38        | 6          |
| <i>bla</i> <sub>VIM1</sub> -F   | TTATggAgCgCAACgATgT                    | <i>bla</i> <sub>VIM1</sub>    | Y18050                       | 3144-3163   | 4          |
| <i>bla</i> <sub>VIM1</sub> -R   | CAAAAgTCCCgCTCCAACgA                   | <i>bla</i> <sub>VIM1</sub>    | Y18050                       | 4063-4044   | 4          |
| <i>bla</i> <sub>VIM2</sub> -F   | AAAgTTATgCCgCACTCACC                   | <i>bla</i> <sub>VIM2</sub>    | AF191564                     | 1282-1301   | 4          |
| <i>bla</i> <sub>VIM2</sub> -R   | TgCAACTTCATgTTATgCCg                   | <i>bla</i> <sub>VIM2</sub>    | AF191564                     | 2146-2127   | 4          |
| <i>bla</i> <sub>IMP1-9</sub> -F | ATgAgCAAgtTATC/TT/AgTATTC              | <i>bla</i> <sub>IMP1-9</sub>  | <i>bla</i> <sub>IMP1-9</sub> | 1-20        | 9          |
| <i>bla</i> <sub>IMP1-9</sub> -R | gCTgCAACgACTTgTTAg                     | <i>bla</i> <sub>IMP59be</sub> | <i>bla</i> <sub>IMP1-9</sub> | 745-765     | 9          |
| <i>tniC</i> -1B                 | TTTCCgAgCgAACAgTCgCT                   | integron determination        | AY943084                     | 4110-4091   | 5          |
| <i>tnpA</i> -R3                 | AAAgACCTCggTAAgTTCgAgCCg               | <i>tnpA</i>                   | EF138817                     | 2210-2188   | this study |
| <i>tnpA</i> -1805F              | ACCTCCAACAaggCCggCgTATagCg             | <i>tnpA</i>                   | EF138817                     | 1805-1829   | this study |
| Int-3686R                       | gTgCagTCggCTTCTgACgTTCagTgC            | <i>int1</i>                   | EF138817                     | 3711-3686   | this study |
| Int-3692F                       | AACgTCAgAAgCCgACTgCACTATAgCagCg        | <i>int1</i>                   | EF138817                     | 3692-3721   | this study |
| VIM-5719R                       | AACTgTgCTTCCgggTAgTgTTgTTgAATCCg       | <i>bla</i> <sub>VIM3</sub>    | EF138817                     | 5749-5719   | this study |
| VIM-outF                        | gAgCggATTCAACAACACTACCCg               | <i>bla</i> <sub>VIM3</sub>    | EF138817                     | 5716-5738   | this study |
| <i>aadB</i> -outR               | gCggCAgATTTcGCTCATCTgC                 | <i>aadB</i>                   | EF138817                     | 7745-7725   | this study |
| <i>aadB</i> -7666F              | AAACgTTAggCCgCATggACACAACgC            | <i>aadB</i>                   | EF138817                     | 7666-7691   | this study |
| <i>sul1</i> 10160R              | TAggCATgATCTAACCCTCggTCTCTggC          | <i>sul1</i>                   | EF138817                     | 10187-10160 | this study |
| 10117F                          | AATCACCTTCTCggAAACCCTCgCg              | <i>sul1</i>                   | EF138817                     | 10117-10140 | this study |
| 12413R                          | gAACCgTCgATACAggCAATTACgTggg           | <i>orfB</i>                   | EF138817                     | 12439-12413 | this study |
| 12400F                          | gAAggAgAACAACAATgACCCACg               | <i>orfB</i>                   | EF138817                     | 12395-12417 | this study |

**Table S2.** Antimicrobial susceptibility of 308 CNSPA isolates at NTUH from 2000 to 2005

| Antibiotic or<br>resistance phenotype | No. (%) of isolates  |                      |                      |                      |                      |                      |
|---------------------------------------|----------------------|----------------------|----------------------|----------------------|----------------------|----------------------|
|                                       | 2000 ( <i>n</i> =60) | 2001 ( <i>n</i> =41) | 2002 ( <i>n</i> =21) | 2003 ( <i>n</i> =63) | 2004 ( <i>n</i> =70) | 2005 ( <i>n</i> =53) |
| Piperacillin/tazobactam               | 51 (85)              | 31 (76)              | 18 (86)              | 58 (92)              | 65 (93)              | 46 (87)              |
| Ceftazidime                           | 45 (75)              | 27 (66)              | 15 (71)              | 53 (84)              | 62 (89)              | 40 (75)              |
| Cefepime                              | 48 (80)              | 26 (63)              | 15 (71)              | 54 (86)              | 63 (90)              | 45 (85)              |
| Aztreonam                             | 43 (72)              | 25 (61)              | 11 (52)              | 54 (86)              | 63 (90)              | 42 (79)              |
| Amikacin                              | 15 (25)              | 10 (24)              | 8 (38)               | 35 (56)              | 38 (54)              | 21 (40)              |
| Ciprofloxacin                         | 33 (55)              | 17 (41)              | 16 (76)              | 49 (78)              | 65 (93)              | 42 (79)              |
| Colistin-intermediate                 | 26 (43)              | 14 (34)              | 6 (29)               | 13 (21)              | 15 (21)              | 26 (49)              |
| COS <sup>a</sup>                      | 0 (0)                | 0 (0)                | 0 (0)                | 12 (19)              | 9 (13)               | 6 (11)               |
| COI <sup>b</sup>                      | 0 (0)                | 0 (0)                | 0 (0)                | 1 (2)                | 2 (3)                | 0 (0)                |

<sup>a</sup>COS, colistin-only-susceptible, resistant to all antibiotics except colistin.

<sup>b</sup>COI, colistin-only-intermediate, resistant to all antibiotics except intermediate to colistin.

**Table S3.** Characteristics of VIM-3 production in 26 XDRPA isolates from six hospitals in Taiwan  
Tn6001 [no. (%) of

| XDRPA                           | VIM-3 [no. (%) of isolates] | In450 [no. (%) of isolates] |                       |                  |                     |
|---------------------------------|-----------------------------|-----------------------------|-----------------------|------------------|---------------------|
|                                 |                             | COI <sup>a</sup>            | COS <sup>b</sup>      | COI <sup>a</sup> | COS <sup>b</sup>    |
| N1 <sup>c</sup> ( <i>n</i> =11) | 11 (100)                    | -                           | 11 (100) <sup>d</sup> | -                | 7 (64) <sup>d</sup> |
| N2 <sup>c</sup> ( <i>n</i> =10) | 4 (40)                      | -                           | 4 (40)                | -                | 4 (40)              |
| C1 <sup>c</sup> ( <i>n</i> =1)  | 0 (0)                       | -                           | 0 (0)                 | -                | 0 (0)               |
| S1 <sup>c</sup> ( <i>n</i> =1)  | 0 (0)                       | -                           | 0 (0)                 | -                | 0 (0)               |
| S2 <sup>c</sup> ( <i>n</i> =2)  | 0 (0)                       | 0 (0)                       | 0 (0)                 | 0 (0)            | 0 (0)               |
| E <sup>c</sup> ( <i>n</i> =1)   | 1 (100)                     | -                           | 1 (100)               | -                | 1 (100)             |
| Total ( <i>n</i> =26)           | 16 (62)                     |                             | 16 (62)               |                  | 12 (46)             |

<sup>a</sup>COI, colistin-only-intermediate, resistant to all antibiotics except intermediate to colistin.

<sup>b</sup>COS, colistin-only-susceptible, resistant to all antibiotics except colistin.

<sup>c</sup>Tri-service General Hospital, Taipei (North, N1); National Taiwan University Hospital, Taipei (North, N2); Taichung Veterans General Hospital (Central, C1); Chung-Ho Memorial Hospital; Kaohsiung Medical University, Kaohsiung (South, S1); Chi-Mei Medical Center,

Tainan (South, S2); and Buddhist Tzu-Chi General Hospital, Hualien (East, E).

<sup>d</sup>In450.2 ( $n=1$ ) and Tn6001.2 ( $n=1$ ) were found in the same clinical isolate.

**Figure S1.** Hybridization of *bla*<sub>VIM-3</sub>-specific probe to SpeI-digested chromosome fragments of *P. aeruginosa* isolates. (a) SpeI restriction patterns separated by PFGE. (b) Hybridization with a *bla*<sub>VIM-3</sub>-specific probe. Lane M, lambda DNA ladder; lane 1, imipenem-susceptible *P. aeruginosa* from patient A; lane 2, imipenem-resistant *P. aeruginosa* from patient A; lane 3, no *bla*<sub>VIM-3</sub> imipenem-resistant *P. aeruginosa* control isolate; lane 4, NTUH-PA450 clinical isolate. The arrows indicate that acquisition of Tn6001 caused band difference.

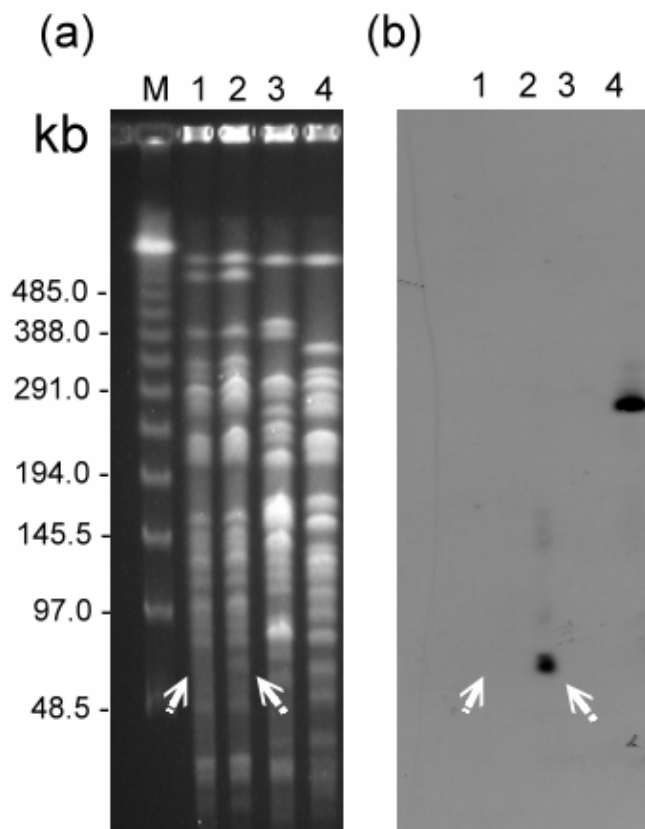

Supplement: dkp341_1.pdf [file dkp341_1.pdf]
